# Supplementary material for: Dengue virus and Japanese encephalitis virus infection of the central nervous system share similar profiles of cytokine accumulation in cerebrospinal fluid
Source: PubMed Central journal article supplement — Cent Eur J Immunol. 2017 Aug 8;42(2):218–22. doi: 10.5114/ceji.2017.69366 (PMC5573897; doi:10.5114/ceji.2017.69366), 2017-08-08
Supplement: CEJI-42-30451-s001.pdf [file CEJI-42-30451-s001.pdf]

# Dengue virus and Japanese encephalitis virus infection of the central nervous system share similar profiles of cytokine accumulation in cerebrospinal fluid

HAIPENG LI<sup>1\*</sup>, YUANYUAN LI<sup>1,2\*</sup>, BO WEN<sup>1\*</sup>, JIAN ZHANG<sup>1</sup>, CHENGWU WANG<sup>1</sup>, ZHANYI SONG<sup>1</sup>, SHUOCHI LI<sup>1</sup>, XIAOWANG QU<sup>1</sup>, RENBIN HUANG<sup>1</sup>, WENPEI LIU<sup>1\*</sup>

<sup>1</sup>Translational Medicine Institute, The First People's Hospital of Chenzhou, University of South China, Chenzhou, Hunan, China

<sup>2</sup>Department of Neurology, The Third People's Hospital of Yancheng, Yancheng, Jiangsu, China

\*These authors made equal contributions

**Suppl. Table 1.** Cytokine expression in serum and CSF of patients with dengue encephalitis

| Parameters (pg/ml) | Serum (n = 29)      | CSF (n = 29)        | p value |
|--------------------|---------------------|---------------------|---------|
| G-CSF              | ND                  | 25.04 (8.20-117.38) | –       |
| IFN- $\gamma$      | 39.11 (29.60-67.43) | 52.13 (28.90-64.18) | 0.743   |
| IL-10              | 3.35 (2.30-4.95)    | 8.06 (3.33-13.93)   | 0.117   |
| IL-12              | 4.64 (2.65-18.20)   | ND                  | –       |
| IL-13              | 0.71 (0.50-0.98)    | 1.08 (0.77-2.48)    | 0.141   |
| IL-17              | 3.49 (1.81-5.96)    | 5.09 (3.01-13.84)   | 0.201   |
| IL-1b              | 0.80 (0.72-5.13)    | 1.16 (0.76-3.82)    | 0.817   |
| IL-2               | 2.10 (1.10-7.30)    | 2.97 (1.98-5.26)    | 0.844   |
| IL-4               | 0.76 (0.66-1.04)    | 0.55 (0.40-1.11)    | 0.305   |
| IL-5               | 3.99 (2.93-4.96)    | ND                  | –       |
| IL-7               | 3.11 (2.30-3.79)    | ND                  | –       |
| MIP-1 $\beta$      | 21.50 (12.53-54.48) | 13.51 (8.32-19.98)  | 0.997   |
| TNF- $\alpha$      | 5.98 (4.61-21.49)   | 9.54 (6.35-14.94)   | 0.572   |

Median and interquartile range values are represented for each group. CSF: cerebrospinal fluid;

IFN – interferon; IL – interleukin; G-CSF – granulocyte-colony stimulating factor; MIP – macrophage inflammatory protein; TNF – tumour necrosis factor;

ND – not detected; \* $p \leq 0.05$  considered significant
