# Supplementary material for: Dengue virus and Japanese encephalitis virus infection of the central nervous system share similar profiles of cytokine accumulation in cerebrospinal fluid
Source: PubMed Central journal article supplement — Cent Eur J Immunol. 2017 Aug 8;42(2):218–22. doi: 10.5114/ceji.2017.69366 (PMC5573897; doi:10.5114/ceji.2017.69366), 2017-08-08
Supplement: CEJI-42-30451-s002.pdf [file CEJI-42-30451-s002.pdf]

# Dengue virus and Japanese encephalitis virus infection of the central nervous system share similar profiles of cytokine accumulation in cerebrospinal fluid

HAIPENG LI<sup>1\*</sup>, YUANYUAN LI<sup>1,2\*</sup>, BO WEN<sup>1\*</sup>, JIAN ZHANG<sup>1</sup>, CHENGWU WANG<sup>1</sup>, ZHANYI SONG<sup>1</sup>, SHUOCHI LI<sup>1</sup>, XIAOWANG QU<sup>1</sup>, RENBIN HUANG<sup>1</sup>, WENPEI LIU<sup>1\*</sup>

<sup>1</sup>Translational Medicine Institute, The First People's Hospital of Chenzhou, University of South China, Chenzhou, Hunan, China

<sup>2</sup>Department of Neurology, The Third People's Hospital of Yancheng, Yancheng, Jiangsu, China

\*These authors made equal contributions

**Suppl. Table 2.** Cytokine expression in serum and CSF of patients with Japanese encephalitis

| Parameters (pg/ml) | Serum (n = 26)      | CSF (n = 26)        | p value |
|--------------------|---------------------|---------------------|---------|
| G-CSF              | ND                  | 29.74 (10.61-89.46) | –       |
| IFN- $\gamma$      | 19.01 (7.42-33.48)  | 29.60 (17.87-48.86) | 0.066   |
| IL-10              | ND                  | 9.78 (5.07-36.06)   | 0.421   |
| IL-12              | ND                  | ND                  | –       |
| IL-13              | ND                  | 1.94 (0.92-3.26)    | –       |
| IL-17              | 3.64 (2.36-8.04)    | 5.28 (2.44-6.22)    | 0.970   |
| IL-1b              | 0.82 (0.56-1.54)    | 1.63 (0.54-2.15)    | 0.281   |
| IL-2               | ND                  | 2.71 (1.32-3.16)    | –       |
| IL-4               | 0.47 (0.33-0.60)    | 0.55 (0.36-0.90)    | 0.101   |
| IL-5               | 2.45 (1.68-4.04)    | ND                  | –       |
| IL-7               | 2.20 (1.42-2.84)    | 1.72 (1.05-2.33)    | 0.550   |
| MIP-1 $\beta$      | 24.11 (10.83-46.23) | 13.45 (7.36-25.91)  | 0.070   |
| TNF- $\alpha$      | ND                  | 6.48 (3.88-13.59)   | –       |

Median and interquartile range values are represented for each group. CSF: cerebrospinal fluid;

IFN – interferon; IL – interleukin; G-CSF – granulocyte-colony stimulating factor; MIP – macrophage inflammatory protein; TNF – tumour necrosis factor;

ND – not detected; \* $p \leq 0.05$  considered significant
